# Supplementary material
Source: Springer Nature journal article supplement (https://www.springermedizin.de/resource/supplementary/12991_2009_1026_MOESM2_ESM.pdf/9615608)
Supplement: MOESM2 [file 9615608]

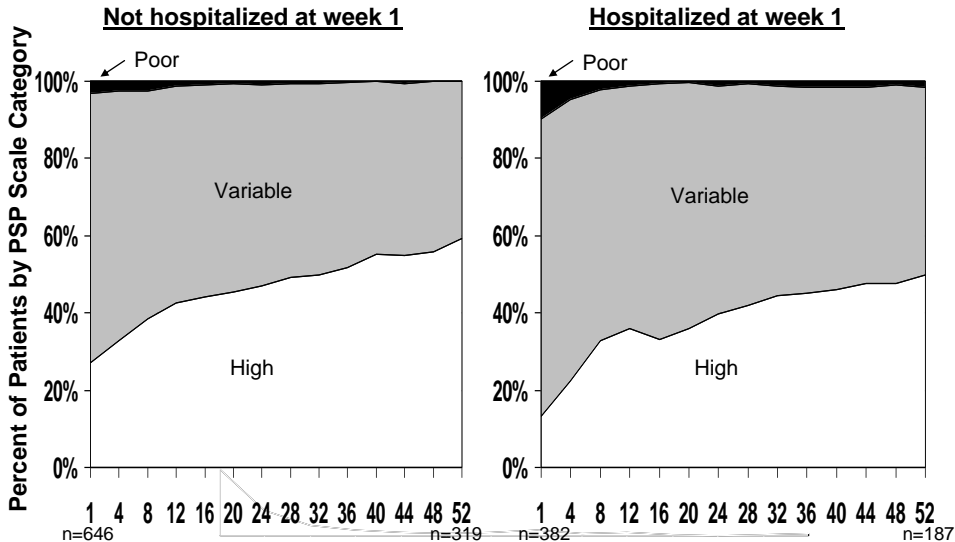

**Week of open label study when PSP was measured**

- Poor=0-30 - patient requires intensive support or supervision
- Variable=31-70 - varying levels of disability
- High=71-100 - mild difficulties
